# Supplementary material for: A systems biology-driven approach to construct a comprehensive protein interaction network of influenza A virus with its host
Source: Springer Nature journal article supplement (doi:10.1186/s12879-020-05214-0), 2020-07-06
Supplement: MOESM1 [file 18151166]

## **Supplementary Materials**

### **A systems biology-driven approach to construct a comprehensive protein interaction network of Influenza A Virus with its Host**

Qurat ul Ain Farooq<sup>1</sup>, Zeeshan Shaukat<sup>2</sup>, Sara Aiman<sup>1</sup>, Tong Zhou<sup>1</sup>, Chunhua Li<sup>1\*</sup>

<sup>1</sup> Faculty of Environmental and Life Sciences, Beijing University of Technology,  
Beijing 100124, China.

<sup>2</sup> Faculty of Information Technology, Beijing University of Technology, Beijing  
100124, China.

\*Correspondence should be addressed to Chunhua Li (E-mail:  
chunhuali@bjut.edu.cn)

Table S1. Common host factors between IAV and HCV infectious pathways.

|         |         |           |          |          |          |
|---------|---------|-----------|----------|----------|----------|
| CREB3   | PPIA    | HNRNPA1   | NISCH    | LRRCC1   | DNAJC7   |
| EEF1G   | RAN     | RPS2      | STRBP    | RPL26    | HSPB1    |
| STAU1   | C1QBP   | RPS3      | RAF1     | RPL23    | RPS17    |
| HSPA8   | PTMA    | RPS12     | TRIM27   | TP53     | LMNB1    |
| IPO4    | PRKDC   | PIK3R1    | BAX      | HSPA4    | NAP1L4   |
| TBRG4   | HACD3   | YWHAB     | GOLGA2   | XAB2     | CALU     |
| PTPLAD1 | APOH    | PIK3CB    | LZTS2    | CSNK2A1  | MAVS     |
| ATXN10  | APOA1   | ADAR      | PI4KB    | ANXA2    | IRF3     |
| RANBP5  | CLU     | HNRNPK    | SSX2IP   | FANCI    | TBK1     |
| BZW2    | SNX4    | YWHAE     | GAPDH    | PSMA7    | IKBKB    |
| DDX20   | ENO1    | RPS24     | NPM1     | MT2A     | CALCOCO2 |
| SAAL1   | ARNT    | YWHAZ     | PFN1     | C7       | PLSCR1   |
| SLC3A2  | NUP214  | YBX1      | HSP90AA1 | ATM      | DNAJB1   |
| CANX    | GPS2    | EEF1A1    | HSP90AB1 | YIPF6    | MVP      |
| MAGED1  | GLYR1   | TUBB4B    | HSPD1    | SECISBP2 | SMURF2   |
| KPNA1   | CCHCR1  | HNRNPU    | CKB      | RNF5     | MYC      |
| USHBP1  | ZMYM2   | ILF2      | CFL1     | PCNA     | BCR      |
| CEP152  | LAMC3   | ELAVL1    | YWHAQ    | DST      | PLA2G4A  |
| KHDRBS1 | DDX3X   | HIST2H2BE | CALR     | EIF3L    | DCAF6    |
| DHX9    | DDX3Y   | PABPN1    | CCT5     | FTH1     | ASXL1    |
| PTBP1   | SLC25A5 | HIST3H2BB | GNB2     | RPS9     | TRAF2    |
| MATR3   | TUBB    | ATXN2L    | TUBA1A   | ZBTB1    | C1orf94  |
| DDX5    | HNRNPC  | XRN2      | MYH14    | SIAH1    | DNAJA3   |

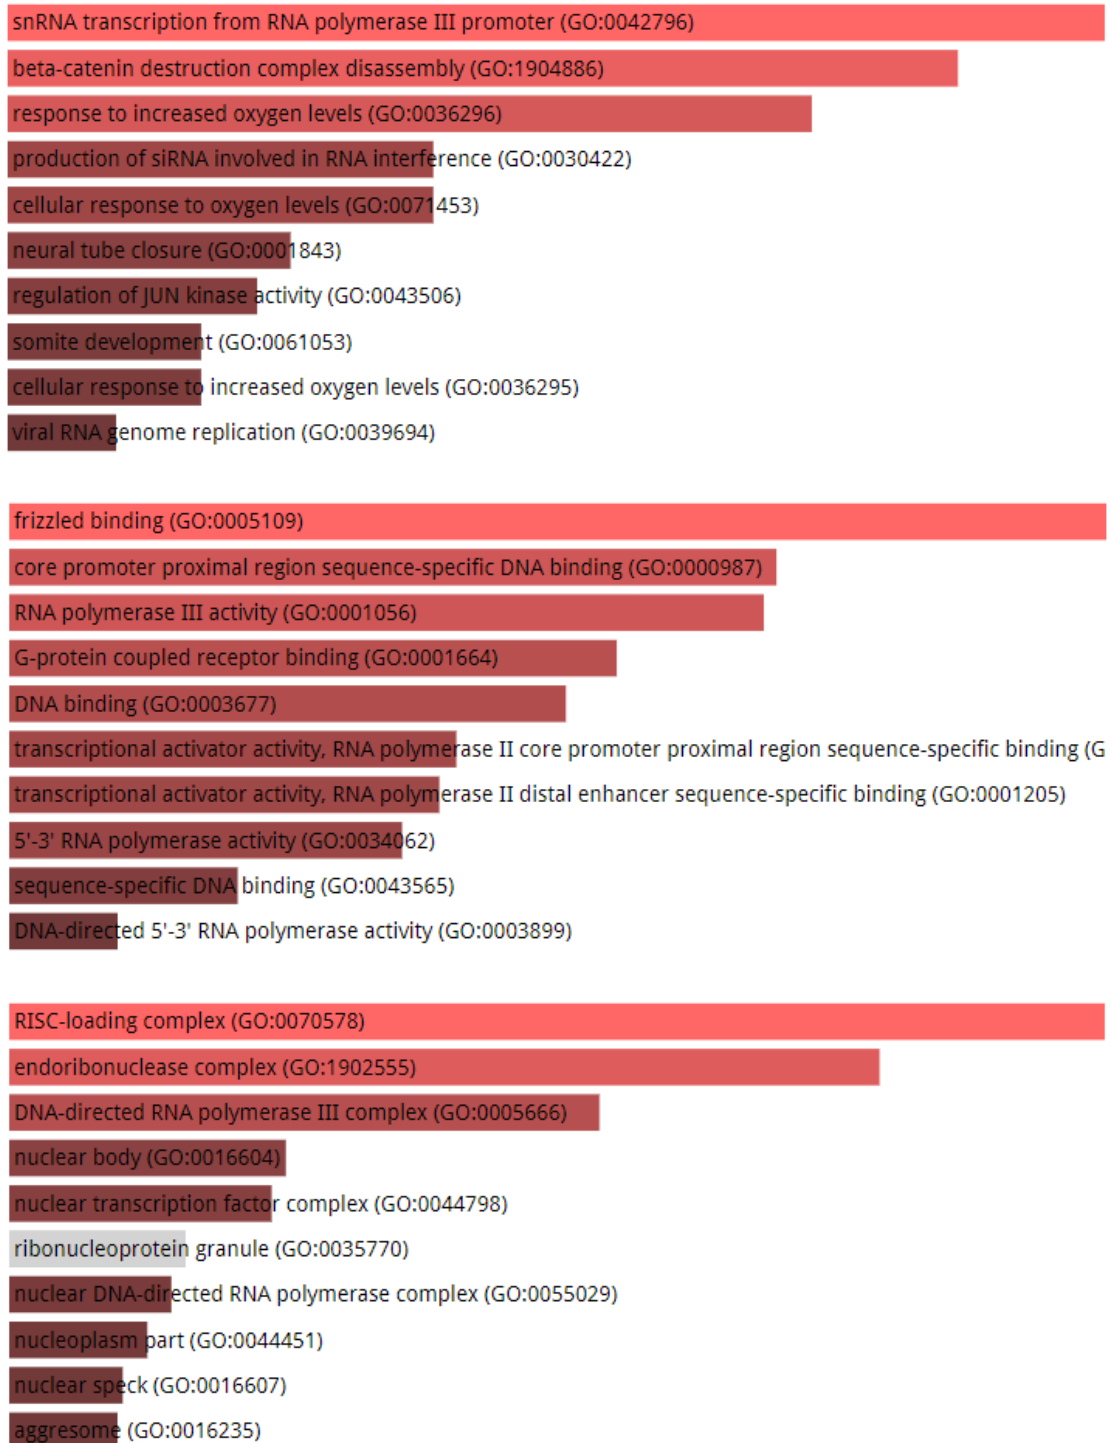

Figure S1,S2 and S3: Results of Gene Ontology Analysis of the top 13 IAV-interacting host proteins, which show the biological processes in which the group of genes are taking part, the molecular functions and cellular components to which they belong respectively.
